# Supplementary material for: Upcycling Low-Quality Cotton Fibers into Mulch Gel Films in a Fast Closed Carbon Cycle
Source: MDPI journal article supplement (doi:10.3390/gels10040218), 2024-03-23
Supplement: s1 [file s1]

## **Supporting Information:**

### **Upcycling Low-Quality Cotton Fibers into Mulch Materials in A Fast Closed Carbon Cycle**

Shaida S. Rumi, Sumedha Liyanage, Zhen Zhang\*, Nouredine Abidi\*

*Fiber and Biopolymer Research Institute, Department of Plant and Soil Science, Texas Tech University, Lubbock, Texas, USA 79409*

\*Corresponding authors: Zhen Zhang (Email: zha03518@ttu.edu); Nouredine Abidi (E-mail: noureddine.abidi@ttu.edu)

a.

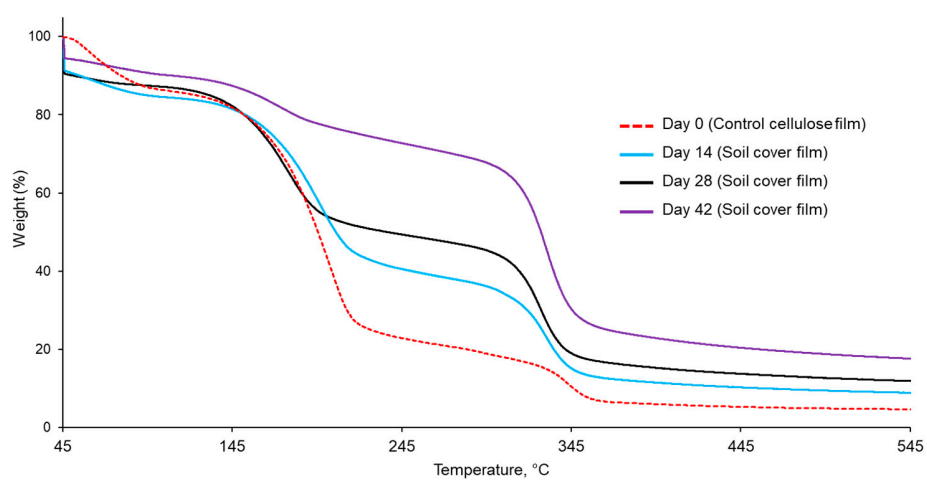

b.

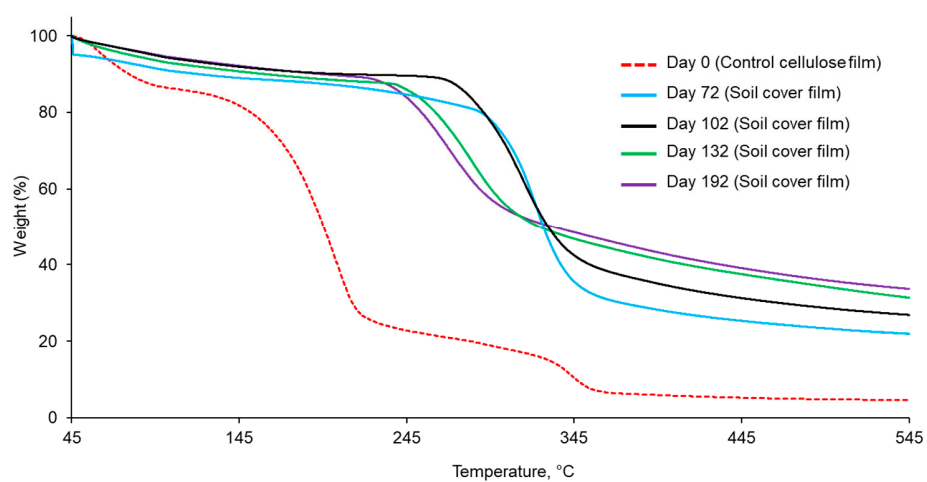

**Figure S1** TGA thermograms of the control and soil cover films from day 0-day 42 days (a) and (b) day 72- day 192.

a.

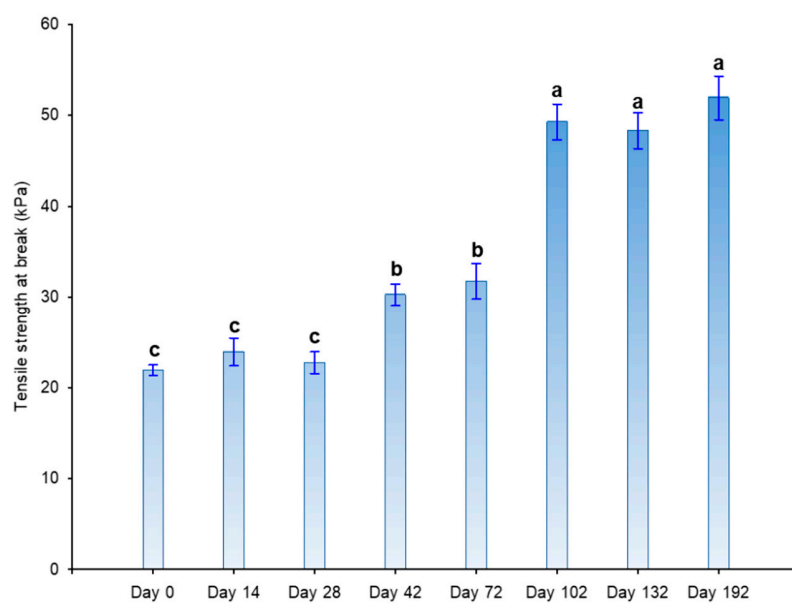

b.

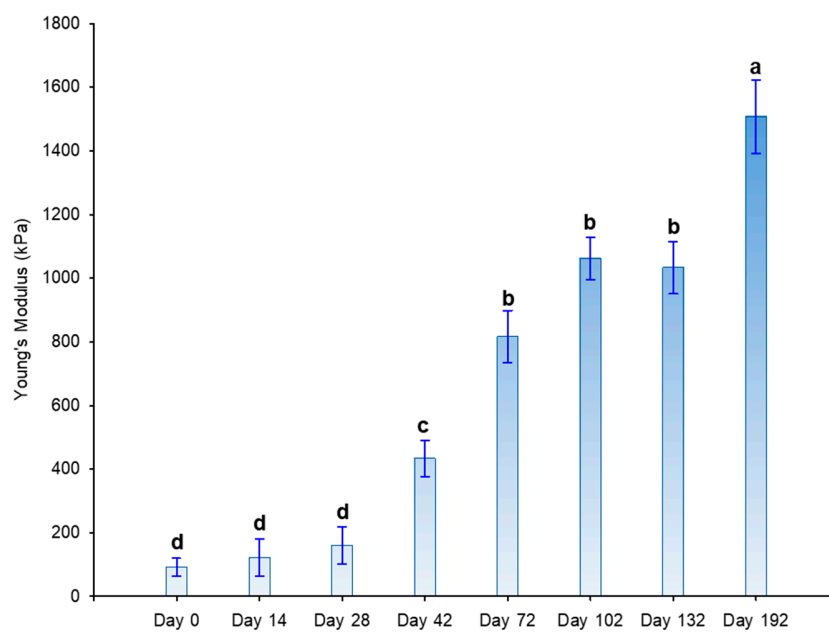

**Figure S2** Tensile properties of cellulose films retrieved from soil cover experiment: (a) tensile strength; (b) Young's Modulus. Values not followed by the same letter significantly differ at  $\alpha = 0.05$ .
